# Supplementary material
Source: publisher site journal article supplement (https://neobiota.pensoft.net/article/21470/download/suppl/31/)
Supplement: Supplementary file 1

## **Methods S1.** Details for plant treatment and data analysis

**Production of F1-generation seeds:** We germinated seeds of *Bunias orientalis* populations already available in 2013 (AL, T3, T4, JE, WU, DR, DI; for population codes see Table 1) and grew the plants ( $n = 4\text{--}9$  per population) outside near Bielefeld University (Germany; latitude:  $52^{\circ}2.022'\text{N}$ , longitude:  $8^{\circ}29.718'\text{E}$ ; 146 m a.s.l.) arranged by population. In the following spring, we covered plants belonging to one population with a semi-transparent fleece to prevent pollinator access. When the plants flowered, we manually pollinated them with a brush transferring pollen only between plants within each population. We collected the first filial generation of silicles from these plants in autumn 2014 to use them in the experiments.

**Composition of mineral nutrient fertiliser solution:** Mineral nutrient solution used for fertilisation of *Bunias orientalis* plants contained 1 (low nitrate treatment), 4 (high), or 2 (intermediate) mM  $\text{Ca}(\text{NO}_3)_2$ , 1 mM KCl, 1 mM  $\text{MgSO}_4$ , 0.5 mM  $\text{KH}_2\text{PO}_4$ , 0.5 mM, 0.05 Fe(III)-citrate, 0.01 mM  $\text{H}_3\text{BO}_3$ , 1  $\mu\text{M}$   $\text{ZnSO}_4$ , 0.5  $\mu\text{M}$   $\text{CuSO}_4$ , 0.2  $\mu\text{M}$   $\text{Na}_2\text{MoO}_4$ , 0.2  $\mu\text{M}$   $\text{NiCl}_2$ , 0.2  $\mu\text{M}$   $\text{MnCl}_2$  and 0.2  $\mu\text{M}$   $\text{CoCl}_2$ .

**Transformation selection for linear mixed-effect models:** For all focal traits, we calculated LMMs on (a) the raw data, (b) the log-transformed data, and (c) square root-transformed data. We computed all possible models for each trait and selected for the best fit, i.e., the highest residual normality (Shapiro-Wilk-test). For two traits, we added 1 to the values to remove zero-values before transformation. Count data could not be analysed with a generalised LMM assuming a Poisson distribution, because the data revealed overdispersion. As datasets did not show typical count data phenomena (zero-inflation) and could easily be transformed to meet linear model assumptions, we treated all count data as continuous data.
